# Supplementary material for: Contraceptive Method Mix: Updates and Implications
Source: PubMed Central journal article supplement (PMC7784075; doi:10.9745/ghsp-d-20-00229), 2020-12-23
Supplement: 20-00229-Bertrand-Supplement.pdf [file 20-00229-Bertrand-Supplement.pdf]

**Supplement. Method Mix for the Earliest and Latest Surveys in 113 Countries**

Note: Only one survey for The United Arab Emirates and Venezuela

|                               |        | Female Steril | Male Steril | IUD  | Implant | Injectable | Pill | Male condom | Traditional methods | Sum |
|-------------------------------|--------|---------------|-------------|------|---------|------------|------|-------------|---------------------|-----|
| <b>ASIA</b>                   |        |               |             |      |         |            |      |             |                     |     |
| Afghanistan                   | 2000   | 16.3          | 2.0         | 6.1  | 0.0     | 26.5       | 24.5 | 0.0         | 24.5                | 100 |
| Afghanistan                   | 2015.5 | 8.5           | 0.0         | 6.6  | 0.9     | 23.2       | 32.2 | 15.6        | 12.8                | 100 |
| Bangladesh                    | 1975.5 | 7.8           | 6.5         | 6.5  | 0.0     | 0.0        | 35.1 | 9.1         | 35.1                | 100 |
| Bangladesh                    | 2014   | 7.4           | 1.9         | 1.0  | 2.7     | 19.9       | 43.3 | 10.3        | 13.5                | 100 |
| Cambodia                      | 1995   | 10.4          | 0.0         | 12.8 | 0.0     | 18.4       | 10.4 | 2.4         | 45.6                | 100 |
| Cambodia                      | 2014   | 5.3           | 0.2         | 7.8  | 3.9     | 16.2       | 31.7 | 3.7         | 31.1                | 100 |
| China                         | 1982   | 25.3          | 9.9         | 50.2 | 0.0     | 0.0        | 8.5  | 2.0         | 4.0                 | 100 |
| China                         | 2006   | 34.0          | 5.3         | 48.1 | 0.4     | 0.0        | 1.4  | 10.1        | 0.7                 | 100 |
| Hong Kong                     | 1982   | 28.5          | 1.7         | 5.0  | 0.0     | 3.9        | 27.8 | 20.9        | 12.2                | 100 |
| Hong Kong                     | 2012   | 4.7           | 0.3         | 8.6  | 0.0     | 2.2        | 10.9 | 70.0        | 3.4                 | 100 |
| India                         | 1980.5 | 0.0           | 0.0         | 3.8  | 0.0     | 0.0        | 7.7  | 32.3        | 56.2                | 100 |
| India                         | 2015.5 | 67.7          | 0.6         | 2.8  | 0.0     | 0.0        | 7.7  | 10.5        | 10.7                | 100 |
| Indonesia                     | 1976   | 1.1           | 0.0         | 21.4 | 0.0     | 0.8        | 56.9 | 6.9         | 13.0                | 100 |
| Indonesia                     | 2016.5 | 6.1           | 0.0         | 7.2  | 8.6     | 51.8       | 20.4 | 2.3         | 3.6                 | 100 |
| Korea, Rep.                   | 1965   | 0.0           | 6.3         | 25.0 | 0.0     | 0.0        | 6.3  | 50.0        | 12.5                | 100 |
| Korea, Rep.                   | 2009   | 8.2           | 23.4        | 17.9 | 0.0     | 0.0        | 2.8  | 33.9        | 13.8                | 100 |
| Laos                          | 1993   | 27.6          | 0.0         | 6.5  | 0.5     | 11.4       | 34.6 | 0.5         | 18.9                | 100 |
| Laos                          | 2011.5 | 9.3           | 0.0         | 3.2  | 0.2     | 27.6       | 43.0 | 2.2         | 14.4                | 100 |
| Malaysia                      | 1974   | 10.3          | 1.2         | 2.1  | 0.0     | 0.6        | 49.2 | 8.2         | 28.3                | 100 |
| Malaysia                      | 2014   | 13.3          | 0.0         | 5.2  | 1.3     | 9.4        | 25.4 | 10.8        | 34.5                | 100 |
| Mongolia                      | 1994   | 1.6           | 0.0         | 57.7 | 0.5     | 1.9        | 4.4  | 5.9         | 28.0                | 100 |
| Mongolia                      | 2013   | 5.9           | 0.0         | 43.2 | 0.9     | 6.8        | 16.0 | 15.4        | 11.8                | 100 |
| Myanmar                       | 1991   | 22.0          | 10.7        | 5.4  | 0.0     | 18.5       | 23.8 | 0.6         | 19.0                | 100 |
| Myanmar                       | 2015.5 | 9.2           | 0.6         | 5.4  | 1.7     | 52.9       | 26.4 | 1.9         | 1.9                 | 100 |
| Nepal                         | 1976   | 2.9           | 47.1        | 2.9  | 0.0     | 0.0        | 11.8 | 5.9         | 29.4                | 100 |
| Nepal                         | 2016.5 | 28.1          | 10.5        | 2.7  | 6.3     | 17.0       | 8.8  | 8.0         | 18.7                | 100 |
| Pakistan                      | 1975   | 17.3          | 1.9         | 13.5 | 0.0     | 0.0        | 19.2 | 19.2        | 28.8                | 100 |
| Pakistan                      | 2012.5 | 25.7          | 0.9         | 6.8  | 0.0     | 8.3        | 4.7  | 26.0        | 27.5                | 100 |
| Philippines                   | 1978   | 13.1          | 1.9         | 6.4  | 0.0     | 0.6        | 12.5 | 10.0        | 55.6                | 100 |
| Philippines                   | 2013   | 15.6          | 0.2         | 6.4  | 0.0     | 6.8        | 35.0 | 3.5         | 32.5                | 100 |
| Sri Lanka                     | 1975   | 0.0           | 0.0         | 21.8 | 0.0     | 1.7        | 7.1  | 9.7         | 59.7                | 100 |
| Sri Lanka                     | 2016   | 22.4          | 0.0         | 16.4 | 7.2     | 13.2       | 13.2 | 10.7        | 16.9                | 100 |
| Thailand                      | 1969.5 | 37.2          | 14.2        | 14.9 | 0.0     | 2.7        | 25.7 | 5.4         | 0.0                 | 100 |
| Thailand                      | 2015.5 | 31.0          | 0.5         | 0.5  | 1.4     | 17.9       | 41.9 | 3.2         | 3.6                 | 100 |
| Timor-Leste                   | 1991   | 0.8           | 0.0         | 17.9 | 14.3    | 41.8       | 5.6  | 0.8         | 18.7                | 100 |
| Timor-Leste                   | 2016   | 5.4           | 0.0         | 7.7  | 23.9    | 45.2       | 8.5  | 0.0         | 9.3                 | 100 |
| Viet Nam                      | 1988   | 5.1           | 0.6         | 62.3 | 0.0     | 0.0        | 0.8  | 2.3         | 29.0                | 100 |
| Viet Nam                      | 2015   | 2.2           | 0.1         | 48.0 | 0.4     | 1.7        | 18.8 | 14.7        | 14.1                | 100 |
| <b>CENTRAL ASIA REPUBLICS</b> |        |               |             |      |         |            |      |             |                     |     |
| Kazakhstan                    | 1995   | 0.0           | 0.0         | 68.2 | 0.0     | 0.0        | 3.1  | 6.4         | 22.4                | 100 |
| Kazakhstan                    | 2015   | 3.1           | 0.0         | 58.6 | 0.0     | 0.2        | 11.2 | 23.0        | 3.9                 | 100 |
| Kyrgyzstan                    | 1997   | 3.0           | 0.0         | 64.3 | 0.0     | 2.2        | 2.9  | 9.6         | 18.0                | 100 |
| Kyrgyzstan                    | 2014   | 3.2           | 0.0         | 55.6 | 0.0     | 0.5        | 10.2 | 25.8        | 4.7                 | 100 |
| Tajikistan                    | 2000   | 0.6           | 0.3         | 76.3 | 0.0     | 2.7        | 1.8  | 1.2         | 17.0                | 100 |
| Tajikistan                    | 2012   | 2.2           | 0.0         | 66.8 | 0.0     | 7.2        | 8.3  | 7.9         | 7.6                 | 100 |
| Turkmenistan                  | 2000   | 3.4           | 0.0         | 72.6 | 0.0     | 1.9        | 2.2  | 3.7         | 16.2                | 100 |
| Turkmenistan                  | 2015.5 | 0.6           | 0.2         | 87.5 | 0.0     | 0.6        | 2.0  | 3.0         | 6.2                 | 100 |
| Uzbekistan                    | 1996   | 1.3           | 0.0         | 82.4 | 0.0     | 2.5        | 3.1  | 3.1         | 7.7                 | 100 |
| Uzbekistan                    | 2006   | 3.4           | 0.2         | 80.0 | 0.2     | 4.3        | 3.7  | 3.4         | 4.8                 | 100 |

|                                     |        |      |     |      |     |      |      |      |      |     |
|-------------------------------------|--------|------|-----|------|-----|------|------|------|------|-----|
| <b>LATIN AMERICA</b>                |        |      |     |      |     |      |      |      |      |     |
| Argentina                           | 2001   | 0.0  | 0.0 | 12.6 | 0.0 | 0.0  | 40.3 | 29.5 | 17.6 | 100 |
| Argentina                           | 2004.5 | 7.4  | 0.0 | 10.6 | 0.0 | 3.0  | 25.9 | 41.7 | 11.4 | 100 |
| Bolivia                             | 1983   | 10.4 | 0.4 | 14.7 | 0.0 | 1.7  | 11.7 | 1.7  | 59.3 | 100 |
| Bolivia                             | 2016   | 15.1 | 0.2 | 10.6 | 5.9 | 18.6 | 6.1  | 10.6 | 33.1 | 100 |
| Brazil                              | 1986   | 40.7 | 1.2 | 1.5  | 0.0 | 0.9  | 38.3 | 2.6  | 14.7 | 100 |
| Brazil                              | 2013   | 26.8 | 5.3 | 2.5  | 0.1 | 6.6  | 42.8 | 12.9 | 3.1  | 100 |
| Chile                               | 2001   | 9.4  | 0.0 | 35.9 | 0.0 | 1.0  | 38.5 | 10.7 | 4.5  | 100 |
| Chile                               | 2015.5 | 15.9 | 0.1 | 22.8 | 0.0 | 9.2  | 33.3 | 10.1 | 8.5  | 100 |
| Colombia                            | 1969   | 0.0  | 0.0 | 14.2 | 0.0 | 0.0  | 25.3 | 0.0  | 60.5 | 100 |
| Colombia                            | 2015.5 | 43.4 | 4.5 | 5.8  | 6.7 | 17.6 | 8.7  | 7.2  | 6.2  | 100 |
| Costa Rica                          | 1976   | 19.6 | 1.6 | 8.3  | 0.0 | 3.2  | 35.9 | 14.0 | 17.4 | 100 |
| Costa Rica                          | 2011   | 35.9 | 6.0 | 3.2  | 0.1 | 11.4 | 27.2 | 14.2 | 2.0  | 100 |
| Cuba                                | 1987   | 31.9 | 0.0 | 47.8 | 0.0 | 0.0  | 14.5 | 2.9  | 2.9  | 100 |
| Cuba                                | 2014   | 33.4 | 0.0 | 32.5 | 0.0 | 0.8  | 10.0 | 21.1 | 2.2  | 100 |
| Dominican Rep.                      | 1975   | 39.4 | 0.3 | 9.3  | 0.0 | 0.7  | 26.2 | 5.0  | 19.2 | 100 |
| Dominican Rep.                      | 2014   | 58.6 | 0.3 | 3.6  | 1.4 | 6.2  | 25.6 | 2.0  | 2.2  | 100 |
| Ecuador                             | 1979   | 24.3 | 0.6 | 15.0 | 0.0 | 2.8  | 29.6 | 3.1  | 24.6 | 100 |
| Ecuador                             | 2009.5 | 40.8 | 0.4 | 6.4  | 7.3 | 13.6 | 14.0 | 6.8  | 10.6 | 100 |
| El Salvador                         | 1985   | 67.5 | 1.5 | 7.0  | 0.0 | 1.5  | 14.0 | 2.5  | 5.9  | 100 |
| El Salvador                         | 2014   | 51.7 | 0.4 | 2.8  | 0.3 | 28.0 | 5.6  | 5.6  | 5.6  | 100 |
| Guatemala                           | 1977.5 | 33.3 | 2.3 | 7.3  | 0.0 | 6.2  | 30.5 | 4.0  | 16.4 | 100 |
| Guatemala                           | 2014.5 | 34.8 | 1.0 | 2.5  | 3.1 | 27.5 | 5.5  | 6.3  | 19.4 | 100 |
| Haiti                               | 1977   | 1.1  | 1.1 | 2.7  | 0.0 | 0.0  | 17.6 | 5.9  | 71.8 | 100 |
| Haiti                               | 2016.5 | 3.6  | 0.6 | 0.3  | 7.4 | 61.7 | 7.1  | 11.9 | 7.4  | 100 |
| Honduras                            | 1981   | 30.5 | 0.8 | 9.2  | 0.0 | 1.1  | 44.7 | 1.1  | 12.6 | 100 |
| Honduras                            | 2011.5 | 30.5 | 0.4 | 9.3  | 0.0 | 24.8 | 16.3 | 5.9  | 12.9 | 100 |
| Jamaica                             | 1975.5 | 22.0 | 0.0 | 5.4  | 0.0 | 16.8 | 32.2 | 17.9 | 5.7  | 100 |
| Jamaica                             | 2008.5 | 13.9 | 0.0 | 1.4  | 1.0 | 19.1 | 24.0 | 35.0 | 5.7  | 100 |
| Mexico                              | 1976.5 | 9.3  | 0.7 | 19.7 | 0.0 | 5.9  | 37.2 | 2.8  | 24.5 | 100 |
| Mexico                              | 2015   | 49.6 | 1.8 | 19.8 | 6.3 | 6.2  | 4.5  | 8.9  | 2.9  | 100 |
| Nicaragua                           | 1981   | 26.7 | 0.4 | 8.6  | 0.0 | 5.3  | 39.5 | 3.0  | 16.5 | 100 |
| Nicaragua                           | 2011.5 | 37.5 | 0.5 | 4.4  | 0.0 | 32.7 | 14.2 | 6.8  | 3.8  | 100 |
| Panama                              | 1975.5 | 40.7 | 0.8 | 7.1  | 0.0 | 1.2  | 32.6 | 2.3  | 15.4 | 100 |
| Panama                              | 2013   | 40.2 | 0.8 | 3.9  | 0.3 | 26.2 | 18.3 | 5.9  | 4.3  | 100 |
| Paraguay                            | 1977   | 11.6 | 0.0 | 14.4 | 0.0 | 3.2  | 42.6 | 9.4  | 18.8 | 100 |
| Paraguay                            | 2016   | 13.0 | 0.1 | 9.0  | 0.0 | 31.5 | 28.1 | 15.4 | 2.8  | 100 |
| Peru                                | 1969.5 | 8.0  | 0.0 | 4.0  | 0.0 | 0.0  | 12.0 | 12.0 | 64.0 | 100 |
| Peru                                | 2016   | 11.3 | 0.5 | 3.2  | 1.7 | 25.1 | 11.3 | 17.9 | 28.9 | 100 |
| Puerto Rico                         | 1968   | 57.0 | 2.3 | 2.7  | 0.0 | 0.0  | 18.9 | 3.5  | 15.6 | 100 |
| Puerto Rico                         | 1995.5 | 59.7 | 4.6 | 1.3  | 0.0 | 0.0  | 12.7 | 8.4  | 13.3 | 100 |
| Trinidad and Tobago                 | 1970.5 | 4.9  | 0.2 | 7.3  | 0.0 | 0.0  | 41.5 | 23.8 | 22.3 | 100 |
| Trinidad and Tobago                 | 2011   | 19.9 | 0.3 | 4.3  | 1.0 | 6.8  | 27.7 | 33.2 | 6.8  | 100 |
| Uruguay                             | 1986   | 0.0  | 0.0 | 13.0 | 0.0 | 0.0  | 57.2 | 15.4 | 14.3 | 100 |
| Uruguay                             | 2015   | 11.5 | 0.8 | 14.1 | 1.5 | 0.9  | 39.1 | 30.5 | 1.6  | 100 |
| Venezuela*                          | 1977   | 15.9 | 0.0 | 17.9 | 0.0 | 0.0  | 31.9 | 10.1 | 24.2 | 100 |
|                                     |        |      |     |      |     |      |      |      |      |     |
| <b>NORTH AFRICA &amp; WEST ASIA</b> |        |      |     |      |     |      |      |      |      |     |
| Algeria                             | 1986.5 | 0.0  | 0.0 | 6.2  | 0.0 | 0.0  | 78.9 | 1.5  | 13.4 | 100 |
| Algeria                             | 2012.5 | 0.9  | 0.0 | 4.0  | 0.4 | 0.2  | 77.5 | 3.4  | 13.7 | 100 |
| Armenia                             | 1991   | 0.0  | 0.0 | 13.9 | 0.0 | 0.0  | 3.0  | 28.0 | 55.0 | 100 |
| Armenia                             | 2015.5 | 1.2  | 0.0 | 15.8 | 0.0 | 0.4  | 4.6  | 26.1 | 51.9 | 100 |
| Azerbaijan                          | 2000   | 0.9  | 0.2 | 17.2 | 0.0 | 0.7  | 6.1  | 3.9  | 71.0 | 100 |
| Azerbaijan                          | 2006   | 0.8  | 0.0 | 18.5 | 0.0 | 0.0  | 2.2  | 4.4  | 74.0 | 100 |
| Bahrain                             | 1989   | 13.4 | 0.0 | 3.0  | 0.0 | 0.0  | 24.4 | 15.3 | 43.8 | 100 |
| Bahrain                             | 1995   | 10.2 | 0.0 | 4.8  | 0.0 | 0.0  | 17.9 | 15.8 | 51.3 | 100 |
| Egypt                               | 1974.5 | 0.0  | 0.0 | 10.1 | 0.0 | 0.0  | 80.2 | 0.0  | 9.7  | 100 |
| Egypt                               | 2014   | 2.1  | 0.0 | 51.5 | 0.9 | 14.6 | 27.4 | 0.9  | 2.7  | 100 |
| Georgia                             | 1999.5 | 4.1  | 0.0 | 24.7 | 0.0 | 0.0  | 2.5  | 16.0 | 52.7 | 100 |
| Georgia                             | 2010   | 5.6  | 0.0 | 24.2 | 0.0 | 0.0  | 7.9  | 26.4 | 35.9 | 100 |
| Iran                                | 1976.5 | 0.0  | 0.0 | 4.3  | 0.0 | 0.0  | 52.7 | 12.2 | 30.8 | 100 |
| Iran                                | 2010.5 | 18.0 | 3.5 | 10.2 | 0.0 | 4.4  | 19.0 | 17.4 | 27.4 | 100 |
| Iraq                                | 1974   | 4.4  | 0.0 | 4.4  | 0.0 | 4.4  | 64.0 | 10.3 | 12.5 | 100 |
| Iraq                                | 2011   | 6.2  | 0.0 | 18.9 | 0.2 | 6.2  | 31.7 | 3.6  | 33.1 | 100 |
| Jordan                              | 1972   | 0.0  | 0.0 | 4.0  | 0.0 | 0.0  | 57.1 | 4.5  | 34.4 | 100 |

|                           |        |      |      |      |      |      |      |      |      |     |
|---------------------------|--------|------|------|------|------|------|------|------|------|-----|
| Jordan                    | 2012   | 3.7  | 0.0  | 35.7 | 0.5  | 1.5  | 13.6 | 13.3 | 31.7 | 100 |
| Kuwait                    | 1984.5 | 4.1  | 0.0  | 12.6 | 0.0  | 0.0  | 79.0 | 0.0  | 4.4  | 100 |
| Kuwait                    | 1999   | 7.9  | 0.0  | 16.9 | 0.0  | 0.0  | 44.9 | 5.6  | 24.8 | 100 |
| Lebanon                   | 1971   | 1.9  | 0.0  | 1.9  | 0.0  | 0.0  | 26.4 | 13.2 | 56.6 | 100 |
| Lebanon                   | 2009   | 1.3  | 0.0  | 33.3 | 0.0  | 0.0  | 42.4 | 8.2  | 14.7 | 100 |
| Libya                     | 1995   | 0.0  | 0.0  | 27.7 | 0.0  | 0.0  | 23.8 | 0.0  | 48.5 | 100 |
| Libya                     | 2007   | 3.6  | 0.0  | 16.3 | 0.0  | 0.7  | 22.3 | 5.5  | 51.6 | 100 |
| Morocco                   | 1979.5 | 4.1  | 0.0  | 8.2  | 0.0  | 0.0  | 70.6 | 1.5  | 15.5 | 100 |
| Morocco                   | 2010.5 | 3.7  | 0.0  | 6.5  | 0.0  | 1.5  | 74.7 | 0.0  | 13.6 | 100 |
| Oman                      | 1988.5 | 25.6 | 0.0  | 17.4 | 0.0  | 3.5  | 27.9 | 12.8 | 12.8 | 100 |
| Oman                      | 2014   | 11.8 | 0.7  | 9.4  | 0.3  | 13.6 | 19.2 | 7.0  | 38.0 | 100 |
| Papua New Guinea          | 1996.5 | 29.3 | 0.8  | 0.4  | 0.0  | 26.3 | 17.0 | 1.9  | 24.3 | 100 |
| Papua New Guinea          | 2006.5 | 26.6 | 1.5  | 0.0  | 0.0  | 28.2 | 14.2 | 4.3  | 25.1 | 100 |
| Saudi Arabia              | 1996.5 | 3.2  | 0.0  | 20.9 | 0.0  | 0.6  | 62.0 | 2.8  | 10.4 | 100 |
| Saudi Arabia              | 2016   | 1.6  | 0.0  | 17.6 | 0.0  | 0.8  | 62.0 | 2.9  | 15.1 | 100 |
| Syria                     | 1978   | 1.8  | 0.4  | 3.3  | 0.0  | 1.8  | 63.6 | 3.6  | 25.5 | 100 |
| Syria                     | 2009   | 4.8  | 0.0  | 42.5 | 0.0  | 1.7  | 16.6 | 3.9  | 30.5 | 100 |
| Tunisia                   | 1978   | 24.4 | 0.0  | 28.3 | 0.0  | 0.3  | 21.2 | 3.9  | 21.8 | 100 |
| Tunisia                   | 2011.5 | 5.0  | 0.0  | 41.1 | 0.7  | 1.6  | 30.9 | 1.8  | 18.9 | 100 |
| Turkey                    | 1963   | 0.0  | 0.0  | 0.0  | 0.0  | 0.0  | 3.8  | 16.3 | 79.8 | 100 |
| Turkey                    | 2013   | 12.8 | 0.0  | 23.0 | 0.0  | 0.8  | 6.3  | 21.6 | 35.5 | 100 |
| United Arab Emirates*     | 1995   | 15.3 | 0.4  | 13.5 | 0.0  | 5.5  | 43.6 | 7.3  | 14.5 | 100 |
| Yemen                     | 1979   | 11.1 | 11.1 | 5.6  | 0.0  | 5.6  | 55.6 | 5.6  | 5.6  | 100 |
| Yemen                     | 2013   | 7.8  | 0.3  | 20.0 | 2.0  | 14.2 | 39.3 | 1.7  | 14.6 | 100 |
|                           |        |      |      |      |      |      |      |      |      |     |
| <b>SUB-SARAHAN AFRICA</b> |        |      |      |      |      |      |      |      |      |     |
| Angola                    | 1996   | 0.0  | 0.0  | 8.6  | 0.0  | 14.8 | 23.5 | 3.7  | 49.4 | 100 |
| Angola                    | 2015.5 | 0.7  | 0.0  | 1.5  | 5.2  | 35.1 | 26.1 | 23.1 | 8.2  | 100 |
| Benin                     | 1981.5 | 0.0  | 1.5  | 1.5  | 0.0  | 0.0  | 4.5  | 3.0  | 89.4 | 100 |
| Benin                     | 2014   | 1.2  | 0.0  | 6.2  | 16.8 | 22.4 | 16.1 | 7.5  | 29.8 | 100 |
| Botswana                  | 1984   | 5.4  | 0.0  | 17.3 | 0.0  | 3.6  | 36.1 | 4.3  | 33.2 | 100 |
| Botswana                  | 2007.5 | 3.5  | 0.2  | 1.3  | 0.0  | 11.3 | 10.1 | 69.3 | 4.3  | 100 |
| Burkina Faso              | 1992.5 | 0.8  | 0.0  | 2.8  | 0.0  | 0.4  | 8.5  | 3.3  | 84.1 | 100 |
| Burkina Faso              | 2016.5 | 0.0  | 0.0  | 3.5  | 46.5 | 32.3 | 11.0 | 3.1  | 3.5  | 100 |
| Burundi                   | 1987   | 1.1  | 0.0  | 3.4  | 0.0  | 5.7  | 2.3  | 1.1  | 86.2 | 100 |
| Burundi                   | 2016.5 | 1.8  | 0.4  | 3.3  | 21.7 | 42.0 | 6.2  | 4.3  | 20.3 | 100 |
| Cameroon                  | 1978   | 0.0  | 0.0  | 8.3  | 0.0  | 0.0  | 8.3  | 8.3  | 75.0 | 100 |
| Cameroon                  | 2014   | 0.7  | 0.0  | 1.0  | 4.5  | 15.4 | 7.9  | 25.0 | 45.5 | 100 |
| Central African Rep.      | 1994.5 | 2.7  | 0.0  | 0.7  | 0.0  | 4.1  | 7.5  | 6.8  | 78.2 | 100 |
| Central African Rep.      | 2010.5 | 1.6  | 0.0  | 0.0  | 1.6  | 4.1  | 48.4 | 18.9 | 25.4 | 100 |
| Chad                      | 1996.5 | 4.8  | 0.0  | 0.0  | 0.0  | 4.8  | 14.3 | 4.8  | 71.4 | 100 |
| Chad                      | 2014.5 | 4.3  | 0.0  | 0.0  | 21.7 | 45.7 | 8.7  | 6.5  | 13.0 | 100 |
| Congo                     | 2005   | 0.5  | 0.0  | 0.2  | 0.0  | 2.3  | 5.3  | 20.6 | 71.0 | 100 |
| Congo                     | 2014.5 | 0.7  | 0.0  | 0.0  | 1.4  | 10.1 | 16.4 | 31.0 | 40.4 | 100 |
| Congo, Democratic Rep.    | 1983   | 4.7  | 0.0  | 2.7  | 0.0  | 3.1  | 5.4  | 1.2  | 82.9 | 100 |
| Congo, Democratic Rep.    | 2013.5 | 3.5  | 0.5  | 1.0  | 3.5  | 6.0  | 3.5  | 17.1 | 64.8 | 100 |
| Côte d'Ivoire             | 1980.5 | 0.0  | 0.0  | 3.4  | 0.0  | 0.0  | 13.8 | 0.0  | 82.8 | 100 |
| Côte d'Ivoire             | 2016   | 1.4  | 0.7  | 0.7  | 7.7  | 36.6 | 44.4 | 0.0  | 8.5  | 100 |
| Equatorial Guinea         | 2000   | 5.4  | 1.1  | 7.6  | 1.1  | 25.0 | 16.3 | 4.3  | 39.1 | 100 |
| Equatorial Guinea         | 2011   | 8.9  | 0.0  | 4.5  | 0.0  | 18.8 | 20.5 | 19.6 | 27.7 | 100 |
| Eritrea                   | 1995.5 | 3.8  | 0.0  | 7.5  | 0.0  | 10.0 | 25.0 | 3.8  | 50.0 | 100 |
| Eritrea                   | 2010   | 3.0  | 0.0  | 4.5  | 0.0  | 26.9 | 34.3 | 11.9 | 19.4 | 100 |
| Ethiopia                  | 1990   | 6.3  | 0.0  | 6.3  | 0.0  | 0.0  | 45.8 | 2.1  | 39.6 | 100 |
| Ethiopia                  | 2017   | 0.6  | 0.0  | 3.3  | 22.9 | 64.4 | 5.0  | 0.3  | 3.6  | 100 |
| Gabon                     | 2000   | 3.2  | 0.0  | 0.0  | 0.0  | 1.6  | 15.6 | 16.6 | 63.0 | 100 |
| Gabon                     | 2012   | 2.0  | 0.0  | 0.0  | 0.0  | 1.3  | 18.8 | 39.5 | 38.5 | 100 |
| Gambia                    | 1990   | 3.4  | 0.0  | 7.6  | 0.0  | 14.4 | 28.0 | 3.4  | 43.2 | 100 |
| Gambia                    | 2013   | 6.7  | 0.0  | 3.3  | 6.7  | 43.3 | 23.3 | 6.7  | 10.0 | 100 |
| Ghana                     | 1979.5 | 6.3  | 0.0  | 3.8  | 0.0  | 1.3  | 30.4 | 7.6  | 50.6 | 100 |
| Ghana                     | 2017   | 4.9  | 0.0  | 2.0  | 27.6 | 25.7 | 15.8 | 5.6  | 18.4 | 100 |
| Guinea                    | 1992   | 0.0  | 0.0  | 0.0  | 0.0  | 0.0  | 38.5 | 7.7  | 53.8 | 100 |
| Guinea                    | 2016   | 0.0  | 0.0  | 0.0  | 9.6  | 42.3 | 32.7 | 0.0  | 15.4 | 100 |
| Guinea-Bissau             | 2000   | 4.5  | 0.0  | 34.3 | 0.0  | 7.5  | 4.5  | 1.5  | 47.8 | 100 |
| Guinea-Bissau             | 2014   | 1.5  | 0.0  | 26.9 | 25.4 | 10.8 | 11.5 | 11.5 | 12.3 | 100 |

|              |        |      |     |      |      |      |      |      |      |     |
|--------------|--------|------|-----|------|------|------|------|------|------|-----|
| Kenya        | 1977.5 | 14.5 | 0.0 | 10.1 | 0.0  | 8.7  | 29.0 | 1.4  | 36.2 | 100 |
| Kenya        | 2016   | 4.9  | 0.0 | 5.8  | 29.8 | 45.5 | 8.4  | 3.0  | 2.6  | 100 |
| Lesotho      | 1977   | 15.3 | 0.0 | 2.8  | 0.0  | 4.2  | 22.2 | 2.8  | 52.8 | 100 |
| Lesotho      | 2014   | 2.8  | 0.2 | 2.2  | 2.3  | 40.0 | 23.7 | 28.2 | 0.7  | 100 |
| Liberia      | 1986   | 17.7 | 0.0 | 9.7  | 0.0  | 4.8  | 53.2 | 0.0  | 14.5 | 100 |
| Liberia      | 2016   | 3.0  | 0.0 | 1.0  | 11.6 | 62.8 | 16.3 | 4.3  | 1.0  | 100 |
| Madagascar   | 1992   | 5.5  | 0.0 | 3.0  | 0.0  | 9.7  | 8.5  | 3.0  | 70.3 | 100 |
| Madagascar   | 2012.5 | 3.6  | 0.0 | 1.8  | 6.7  | 51.6 | 17.1 | 2.6  | 16.6 | 100 |
| Malawi       | 1984   | 0.0  | 0.0 | 6.3  | 0.0  | 2.1  | 14.6 | 0.0  | 77.1 | 100 |
| Malawi       | 2015.5 | 18.5 | 0.2 | 1.9  | 19.5 | 50.8 | 4.1  | 3.2  | 1.9  | 100 |
| Mali         | 1987   | 2.2  | 0.0 | 2.2  | 0.0  | 2.2  | 19.6 | 0.0  | 73.9 | 100 |
| Mali         | 2015   | 1.9  | 0.0 | 1.3  | 28.6 | 41.6 | 24.0 | 0.0  | 2.6  | 100 |
| Mauritania   | 1981   | 28.6 | 0.0 | 0.0  | 0.0  | 0.0  | 0.0  | 0.0  | 71.4 | 100 |
| Mauritania   | 2015   | 0.6  | 0.0 | 1.7  | 4.5  | 20.1 | 59.8 | 1.1  | 12.3 | 100 |
| Mauritius    | 1985   | 6.2  | 0.0 | 3.1  | 0.0  | 8.6  | 28.3 | 12.5 | 41.2 | 100 |
| Mauritius    | 2014   | 11.6 | 0.0 | 2.6  | 1.4  | 2.6  | 14.2 | 16.9 | 50.7 | 100 |
| Mozambique   | 1997   | 12.7 | 0.0 | 5.5  | 0.0  | 41.8 | 25.5 | 5.5  | 9.1  | 100 |
| Mozambique   | 2015   | 0.8  | 0.0 | 3.1  | 6.6  | 51.9 | 24.8 | 5.8  | 7.0  | 100 |
| Namibia      | 1989   | 15.6 | 0.2 | 3.4  | 0.0  | 39.1 | 20.0 | 0.0  | 21.5 | 100 |
| Namibia      | 2013   | 11.7 | 0.5 | 2.2  | 0.4  | 49.0 | 12.8 | 21.9 | 1.5  | 100 |
| Niger        | 1992   | 2.2  | 0.0 | 4.4  | 0.0  | 11.1 | 33.3 | 0.0  | 48.9 | 100 |
| Niger        | 2017   | 0.5  | 0.0 | 1.1  | 16.5 | 38.8 | 38.8 | 0.0  | 4.3  | 100 |
| Nigeria      | 1981.5 | 0.0  | 0.0 | 1.5  | 0.0  | 3.0  | 7.5  | 0.0  | 88.1 | 100 |
| Nigeria      | 2016.5 | 1.6  | 0.0 | 5.6  | 11.1 | 34.1 | 18.3 | 8.7  | 20.6 | 100 |
| Qatar        | 1987   | 14.2 | 0.0 | 27.0 | 0.0  | 0.0  | 41.2 | 6.9  | 10.7 | 100 |
| Qatar        | 2012   | 2.2  | 3.0 | 29.2 | 0.5  | 11.7 | 36.2 | 8.7  | 8.4  | 100 |
| Rwanda       | 1983   | 0.0  | 0.0 | 2.7  | 0.0  | 3.6  | 1.8  | 0.0  | 91.8 | 100 |
| Rwanda       | 2014.5 | 2.3  | 0.4 | 2.1  | 14.8 | 46.0 | 16.1 | 7.3  | 11.1 | 100 |
| Senegal      | 1978   | 0.0  | 0.0 | 5.1  | 0.0  | 0.0  | 7.7  | 2.6  | 84.6 | 100 |
| Senegal      | 2016   | 2.8  | 0.0 | 6.4  | 28.5 | 32.9 | 18.5 | 2.4  | 8.4  | 100 |
| Sierra Leone | 1992   | 0.0  | 0.0 | 16.0 | 0.0  | 8.0  | 68.0 | 4.0  | 4.0  | 100 |
| Sierra Leone | 2013   | 3.2  | 0.0 | 0.6  | 15.4 | 48.1 | 25.0 | 1.3  | 6.4  | 100 |
| Somalia      | 1999   | 0.0  | 0.0 | 0.0  | 0.0  | 0.0  | 50.0 | 0.0  | 50.0 | 100 |
| Somalia      | 2006   | 0.0  | 0.0 | 5.9  | 0.0  | 11.8 | 47.1 | 0.0  | 35.3 | 100 |
| South Africa | 1988   | 16.2 | 2.8 | 10.7 | 0.0  | 39.7 | 26.7 | 1.4  | 2.4  | 100 |
| South Africa | 2016   | 14.1 | 1.1 | 2.2  | 6.1  | 43.9 | 15.4 | 16.1 | 1.1  | 100 |
| South Sudan  | 2006   | 0.0  | 0.0 | 0.0  | 0.0  | 0.0  | 16.7 | 66.7 | 16.7 | 100 |
| South Sudan  | 2010   | 2.9  | 0.0 | 0.0  | 0.0  | 11.4 | 8.6  | 11.4 | 65.7 | 100 |
| Sudan        | 1978.5 | 6.7  | 0.0 | 2.2  | 0.0  | 4.4  | 68.9 | 2.2  | 15.6 | 100 |
| Sudan        | 2014   | 0.0  | 0.0 | 3.4  | 2.6  | 12.1 | 77.6 | 0.0  | 4.3  | 100 |
| Swaziland    | 1988.5 | 16.2 | 1.0 | 9.1  | 0.0  | 27.9 | 27.9 | 3.6  | 14.2 | 100 |
| Swaziland    | 2014   | 5.7  | 0.0 | 1.1  | 5.8  | 33.6 | 16.1 | 36.7 | 0.9  | 100 |
| Tanzania     | 1991.5 | 15.4 | 0.0 | 3.8  | 0.0  | 3.8  | 32.7 | 6.7  | 37.5 | 100 |
| Tanzania     | 2015.5 | 8.9  | 0.3 | 2.4  | 17.6 | 33.2 | 14.5 | 6.3  | 16.8 | 100 |
| Togo         | 1988   | 1.8  | 0.0 | 2.4  | 0.0  | 0.6  | 1.2  | 1.2  | 92.8 | 100 |
| Togo         | 2013.5 | 1.5  | 0.0 | 4.0  | 23.7 | 35.9 | 11.1 | 10.6 | 13.1 | 100 |
| Uganda       | 1988.5 | 16.3 | 0.0 | 4.1  | 0.0  | 8.2  | 22.4 | 0.0  | 49.0 | 100 |
| Uganda       | 2017   | 6.9  | 0.0 | 2.4  | 18.8 | 46.7 | 7.2  | 6.1  | 11.9 | 100 |
| Zambia       | 1992   | 13.9 | 0.0 | 3.3  | 0.0  | 0.7  | 28.5 | 11.9 | 41.7 | 100 |
| Zambia       | 2013.5 | 4.0  | 0.0 | 2.5  | 11.4 | 40.1 | 24.5 | 8.3  | 9.1  | 100 |
| Zimbabwe     | 1984   | 4.2  | 0.3 | 1.8  | 0.0  | 2.1  | 59.0 | 1.8  | 30.8 | 100 |
| Zimbabwe     | 2015   | 1.2  | 0.0 | 0.9  | 14.5 | 14.5 | 61.7 | 5.7  | 1.5  | 100 |
